# Supplementary material for: Impact of Spontaneous Fermentation and Inoculum with Natural Whey Starter on Peptidomic Profile and Biological Activities of Cheese Whey: A Comparative Study
Source: MDPI journal article supplement (doi:10.3390/fermentation9030270), 2023-03-10
Supplement: s1 [file s1]

# Impact of spontaneous fermentation and inoculum with natural whey starter on peptidomic profile and biological activities of cheese whey: a comparative study

Ahmed Helal<sup>1,2</sup>, Chiara Nasuti <sup>2</sup>, Laura Sola <sup>2</sup>, Giada Sassi <sup>2</sup>, Davide Tagliazucchi <sup>2</sup> and Lisa Solieri <sup>2,3\*</sup>

<sup>1</sup> Department of Food and Dairy Sciences and Technology, Damanhour University, 22516 Damanhour, Egypt

<sup>2</sup> Department of Life Sciences, University of Modena and Reggio Emilia, Via Amendola, 2 - Pad. Besta, 42100 Reggio Emilia, Italy

<sup>3</sup> NBFC, National Biodiversity Future Center, 90133 Palermo, Italy

\* Correspondence: [lisa.solieri@unimore.it](mailto:lisa.solieri@unimore.it)

## Supplementary Materials

| Strains                | Isolation                      | Cell morphology | Gram staining | Catalase reaction | 16S-ARDRA with <i>HhaI</i> <sup>1</sup> | Species attribution                        |
|------------------------|--------------------------------|-----------------|---------------|-------------------|-----------------------------------------|--------------------------------------------|
| DSM20072 <sup>T</sup>  | DSMZ <sup>2</sup>              | rod             | +             | +                 | 880-210-150-130-100                     | <i>L. delbrueckii</i> subsp. <i>lactis</i> |
| RO4F06                 | MRS pH 6.5, 42°C, anaerobiosis | rod             | +             | +                 | 880-210-150-130-100                     | <i>L. delbrueckii</i> subsp. <i>lactis</i> |
| RO4F16                 | MRS pH 6.5, 42°C, anaerobiosis | rod             | +             | +                 | 880-210-150-130-100                     | <i>L. delbrueckii</i> subsp. <i>lactis</i> |
| DSM20617 <sup>T</sup>  | DSMZ                           | cocci           | +             | +                 | 600-220-190-180-130-80                  | <i>S. thermophilus</i>                     |
| RO4F01                 | M17-SSW, 42°, aerobiosis       | cocci           | +             | +                 | 600-220-190-180-130-80                  | <i>S. thermophilus</i>                     |
| RO4F03                 | M17-SSW, 42°, aerobiosis       | cocci           | +             | +                 | 600-220-190-180-130-80                  | <i>S. thermophilus</i>                     |
| RO4F04                 | M17-SSW, 42°, aerobiosis       | cocci           | +             | +                 | 600-220-190-180-130-80                  | <i>S. thermophilus</i>                     |
| RO4F05                 | M17-SSW, 42°, aerobiosis       | cocci           | +             | +                 | 600-220-190-180-130-80                  | <i>S. thermophilus</i>                     |
| RO4F09                 | M17-SSW, 42°, aerobiosis       | cocci           | +             | +                 | 600-220-190-180-130-80                  | <i>S. thermophilus</i>                     |
| RO4F12                 | M17-SSW, 42°, aerobiosis       | cocci           | +             | +                 | 600-220-190-180-130-80                  | <i>S. thermophilus</i>                     |
| RO4F13                 | M17-SSW, 42°, aerobiosis       | cocci           | +             | +                 | 600-220-190-180-130-80                  | <i>S. thermophilus</i>                     |
| RO4F15                 | M17-SSW, 42°, aerobiosis       | cocci           | +             | +                 | 600-220-190-180-130-80                  | <i>S. thermophilus</i>                     |
| RO4F08                 | M17-SSW, 42°, aerobiosis       | cocci           | +             | +                 | 600-220-190-180-130-80                  | <i>S. thermophilus</i>                     |
| DSM 20075 <sup>T</sup> | DSMZ                           | rod             | +             | +                 | 640-400-260-140-90                      | <i>L. helveticus</i>                       |
| RO4F02                 | MRS pH 6.5, 42°C, anaerobiosis | rod             | +             | +                 | 640-400-260-140-90                      | <i>L. helveticus</i>                       |
| RO4F07                 | MRS pH 6.5, 42°C, anaerobiosis | rod             | +             | +                 | 640-400-260-140-90                      | <i>L. helveticus</i>                       |

|        |                                   |     |   |   |                    |                      |
|--------|-----------------------------------|-----|---|---|--------------------|----------------------|
| RO4F10 | MRS pH 6.5, 42°C,<br>anaerobiosis | rod | + | + | 640-400-260-140-90 | <i>L. helveticus</i> |
| RO4F14 | MRS pH 6.5, 42°C,<br>anaerobiosis | rod | + | + | 640-400-260-140-90 | <i>L. helveticus</i> |
| RO4F11 | MRS pH 6.5, 42°C,<br>anaerobiosis | rod | + | + | 640-400-260-140-90 | <i>L. helveticus</i> |

<sup>1</sup> Fragment size is in bp. <sup>2</sup> DSMZ, Deutsche Sammlung von Mikroorganismen und Zellkulturen.

2  
3  
4

**Supplementary Table S2.** Phenotypic and molecular characterization of yeast isolates from NWS used as inoculum in this study.

| Strains | Isolation  | Cell morphology | PCR amplicon | RFLP with <i>Hae</i> III <sup>1</sup> | Species attribution (Yeast-ID score) |
|---------|------------|-----------------|--------------|---------------------------------------|--------------------------------------|
| RO6107  | YPDA, 27°C | ellipsoidal     | 880          | 325-230-170-125                       | <i>S. cerevisiae</i> (100%)          |
| RO6108  | YPDA, 27°C | ellipsoidal     | 880          | 325-230-170-125                       | <i>S. cerevisiae</i> (100%)          |
| RO7107  | YPDA, 27°C | ellipsoidal     | 740          | 655-80                                | <i>K. marxianus</i> (100%)           |
| RO7108  | YPDA, 27°C | ellipsoidal     | 740          | 655-80                                | <i>K. marxianus</i> (100%)           |
| RO6109  | YPLA, 42°C | ellipsoidal     | 740          | 655-80                                | <i>K. marxianus</i> (100%)           |
| RO6110  | YPLA, 42°C | ellipsoidal     | 740          | 655-80                                | <i>K. marxianus</i> (100%)           |
| RO7109  | YPLA, 42°C | ellipsoidal     | 740          | 655-80                                | <i>K. marxianus</i> (100%)           |
| RO7110  | YPLA, 42°C | ellipsoidal     | 740          | 655-80                                | <i>K. marxianus</i> (100%)           |

<sup>1</sup> Fragment size is in bp.

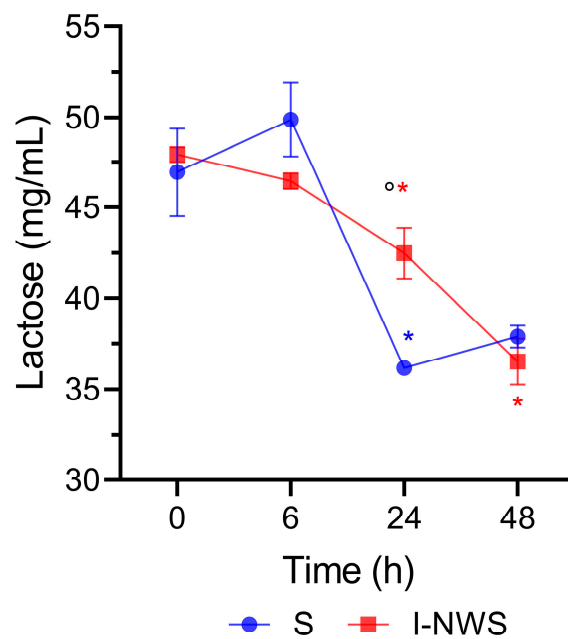

**Supplementary Figure S1.** Trends of lactose concentration (mg/mL) during S (blue) and I-NWS (red) whey fermentation. Values are expressed as means of at least three replicates. Asterisks (blue for S and red for I-NWS) indicate significant differences over time in the same fermentation batch, while dots significant differences among samples at the same fermentation time ( $p < 0.05$ ).
